# Supplementary material for: Carbapenem-resistant Escherichia coli exhibit diverse spatiotemporal epidemiological characteristics across the globe
Source: PubMed Central journal article supplement (PMC10771496; doi:10.1038/s42003-023-05745-7), 2024-01-06
Supplement: 42003_2023_5745_MOESM3_ESM.pdf [file 42003_2023_5745_MOESM3_ESM.pdf]

## Description of Additional Supplementary Files

**File name:** Supplementary Data 1

**Description:** The strain list and information used from the NCBI Pathogens database.

**File name:** Supplementary Data 2

**Description:** The source data behind Fig 1b in the paper.

**File name:** Supplementary Data 3

**Description:** The source data behind Fig 1c in the paper.

**File name:** Supplementary Data 4

**Description:** The source data behind Fig 1d in the paper.

**File name:** Supplementary Data 5

**Description:** The source data behind Fig 1e in the paper.

**File name:** Supplementary Data 6

**Description:** The source data behind Fig 2a in the paper.

**File name:** Supplementary Data 7

**Description:** The source data behind Fig 2a in the paper.

**File name:** Supplementary Data 8

**Description:** The source data behind Fig 3 in the paper.

**File name:** Supplementary Data 9

**Description:** The source data behind Fig 4 in the paper.
